# Supplementary material
Source: publisher figshare collection journal article supplement (https://future-science-group.figshare.com/ndownloader/files/31796822)
Supplement: Supplementary file 1 [file 31796822]

| Supplementary Table S1. Number of pain medications used before and after the procedure.   | **Pain Medications** | **Baseline (n=43)** | **Week 52** | | --- | --- | --- | | Non-opioids (analgesics/NSAIDs/adjuvants) | Mean: 1.4, SD: 0.7*  Median: 1  Interquartile range: 1-2  Range: 0-3 | Mean: 1.0, SD: 0.5*  Median: 1  Interquartile range: 1-1  Range: 0-2 | | Opioids** | Mean: 0.9, SD: 0.5*  Median: 1  Interquartile range: 1-1  Range: 0-3 | Mean: 0.3, SD: 0.5**  Median: 0  Interquartile range: 0-1  Range: 0-2 |   *Data not available for 3 patients.  **Data not available for 4 patients.  NSAIDs = non-steroidal anti-inflammatory drugs. |
| --- | --- | --- | --- | --- | --- | --- | --- | --- | --- |
